# Supplementary material
Source: Springer Nature journal article supplement (https://www.springermedizin.de/resource/supplementary/12875_2013_977_MOESM2_ESM.pdf/9435534)

Campaign "Look at Diabetes"

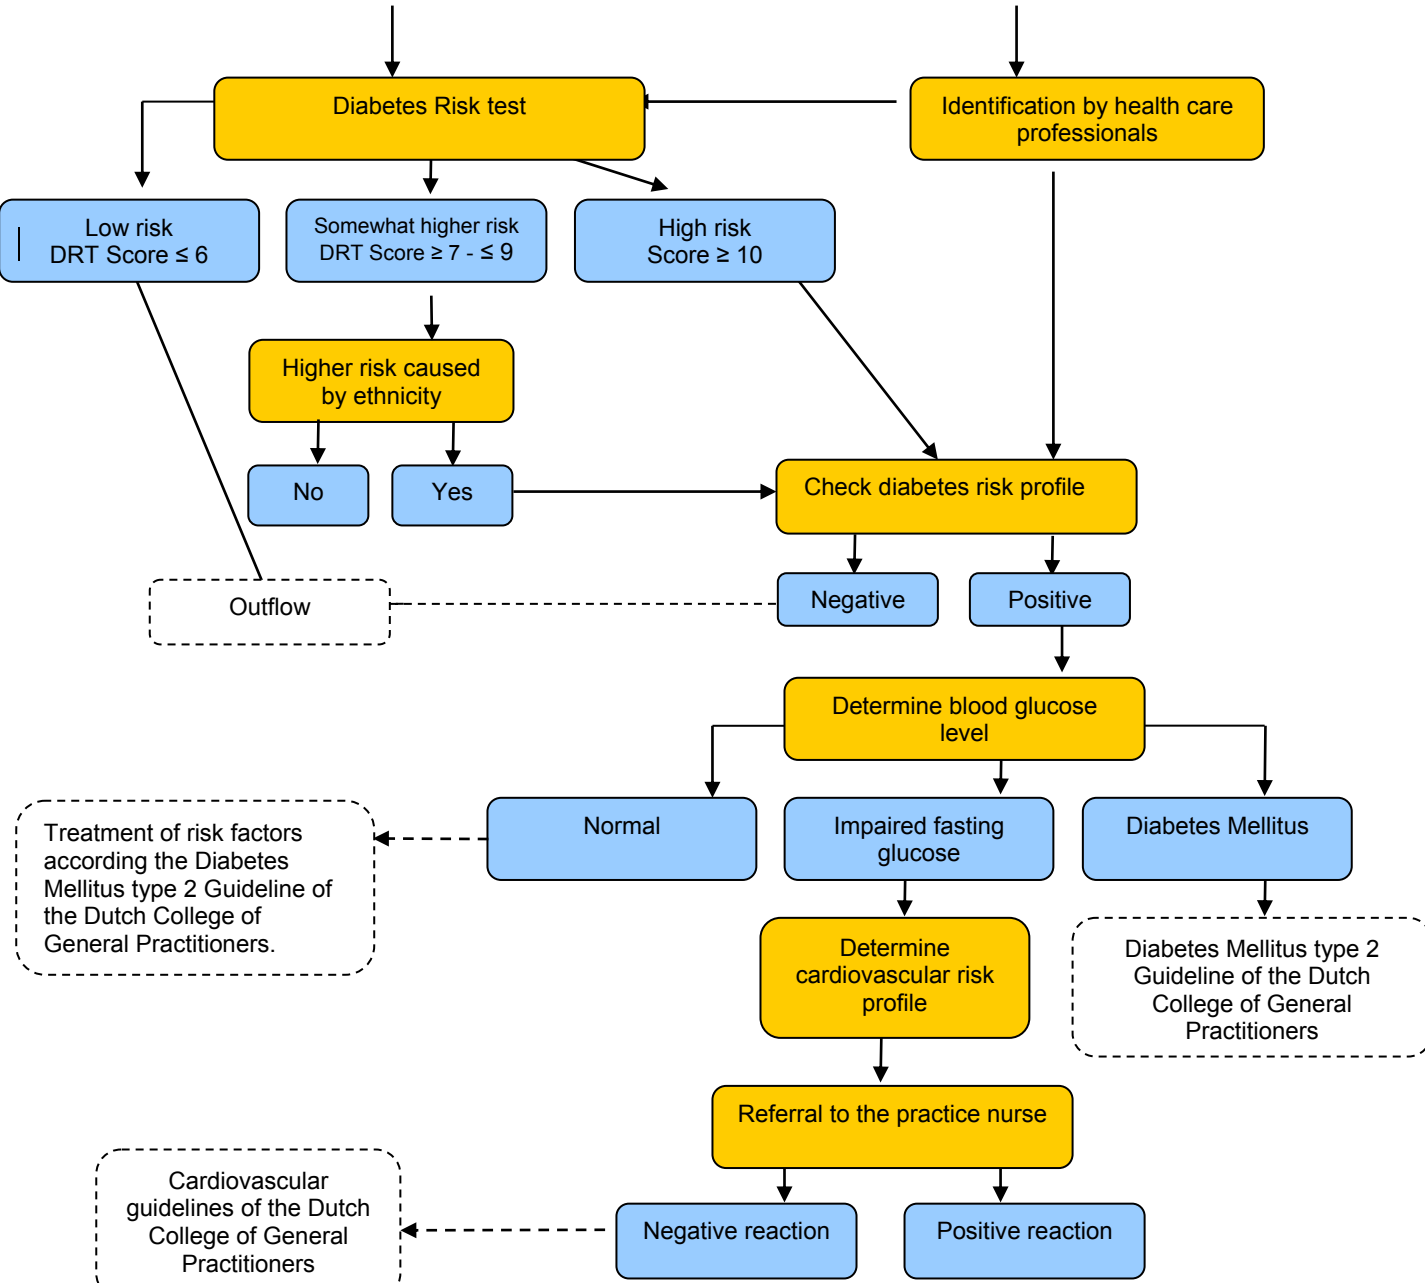

Supplement: MOESM2 [file 9435534]
